# Supplementary material for: Maternal adverse childhood experiences before pregnancy are associated with epigenetic aging changes in their children
Source: publisher site journal article supplement (doi:10.18632/aging.203776), 2021-12-18
Supplement: Supplementary file [file aging-v13i24-203776-supplementary-material-SD1.pdf]

**SUPPLEMENTARY FIGURES**

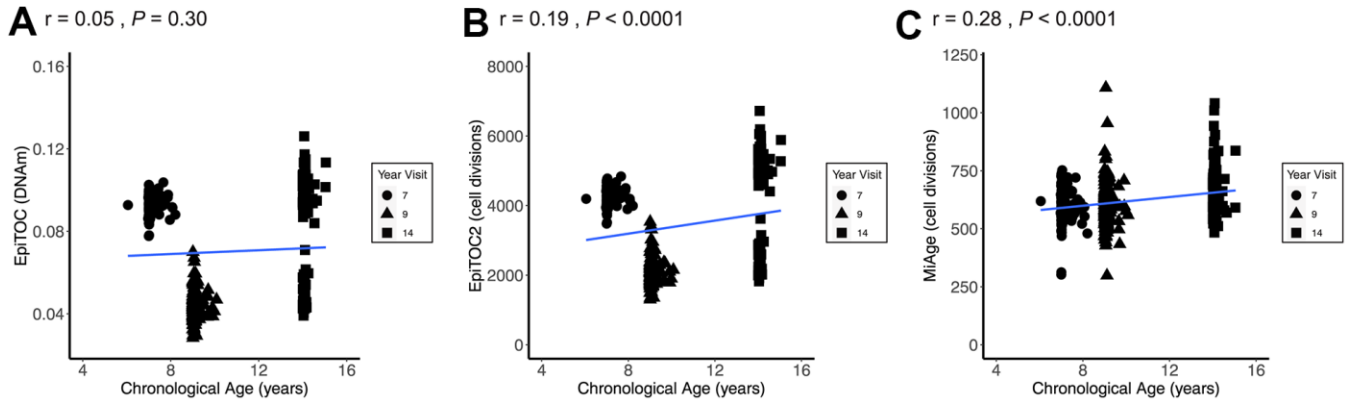

**Supplementary Figure 1. Epigenetic mitotic clock correlations with chronological age.** Supplementary Figure 2 presents the child chronological age and epigenetic mitotic clock correlation coefficients across all three CHAMACOS participant age timepoints (Obs = 483) for EpiTOC (A), EpiTOC2 (B), and MiAge (C).

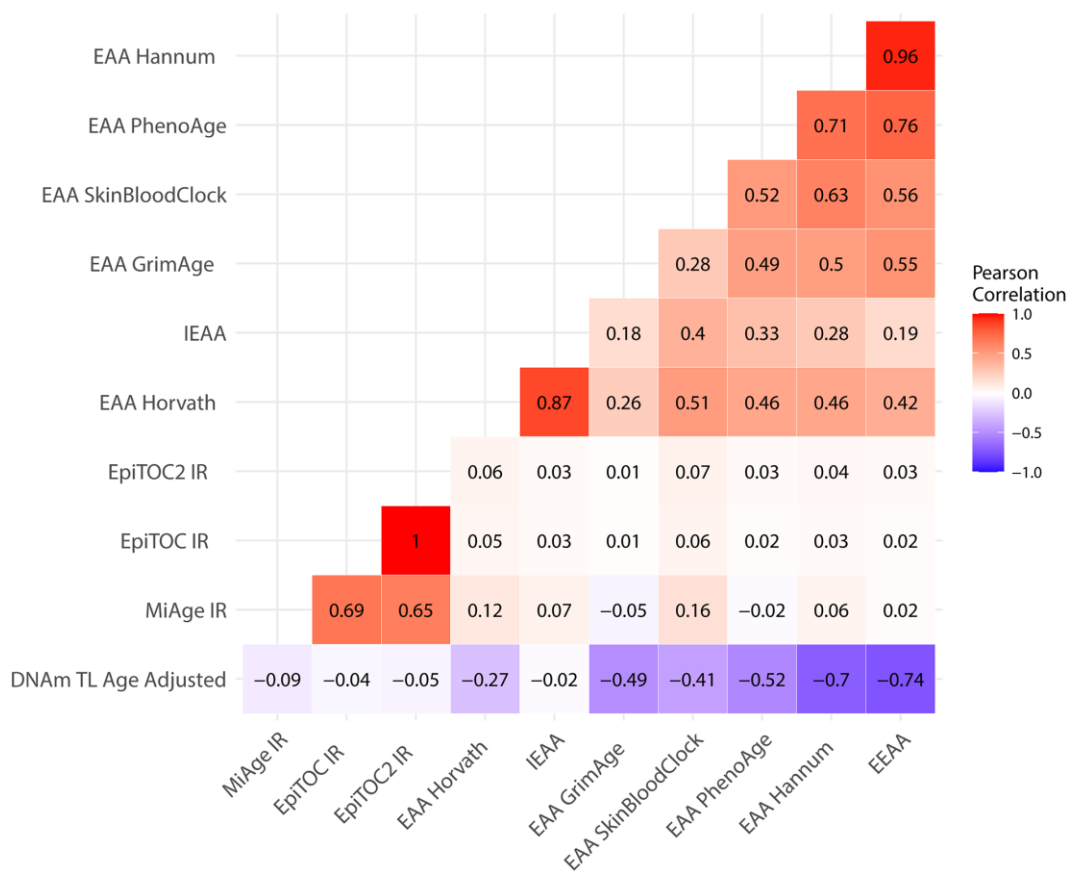

**Supplementary Figure 2. Heatmap of Pearson correlation coefficients for methylation-based aging biomarkers.** Supplementary Figure 2 presents Pearson correlation coefficients for child methylation-based age biomarkers across all three CHAMACOS participant age timepoints (Obs = 483).
